# Supplementary material
Source: MDPI journal article supplement (https://www.mdpi.com/2073-4441/14/19/3087)
Supplement: s1 [file s1]

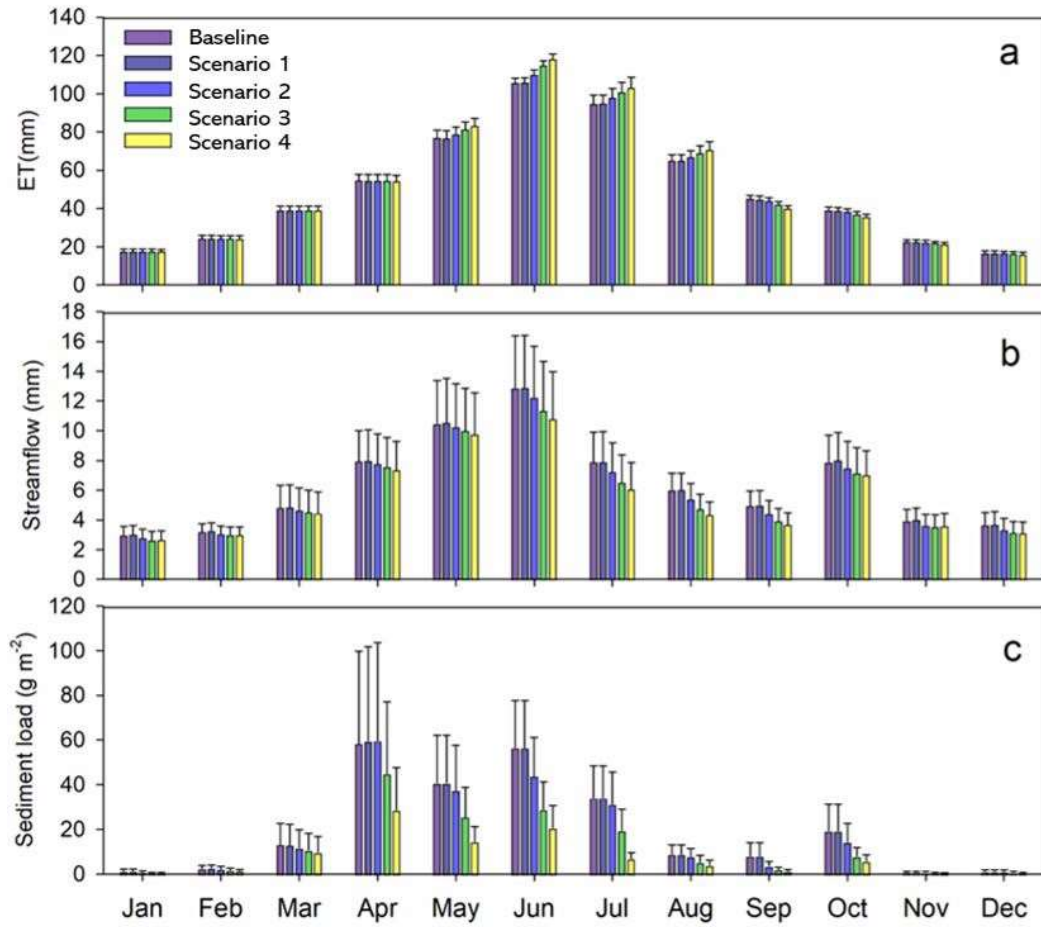

**Figure S1.** Average monthly (a) evapotranspiration, (b) streamflow, and (c) sediment yield during the model simulation period (2002–2018) for the baseline and four land use change scenarios in the Lower Cimarron River Basin, north-central OK, USA.
